# Supplementary material
Source: publisher site journal article supplement (https://www.dovepress.com/article/570687)

**Supplementary Figure 1:** The failure pattern of PMMA.


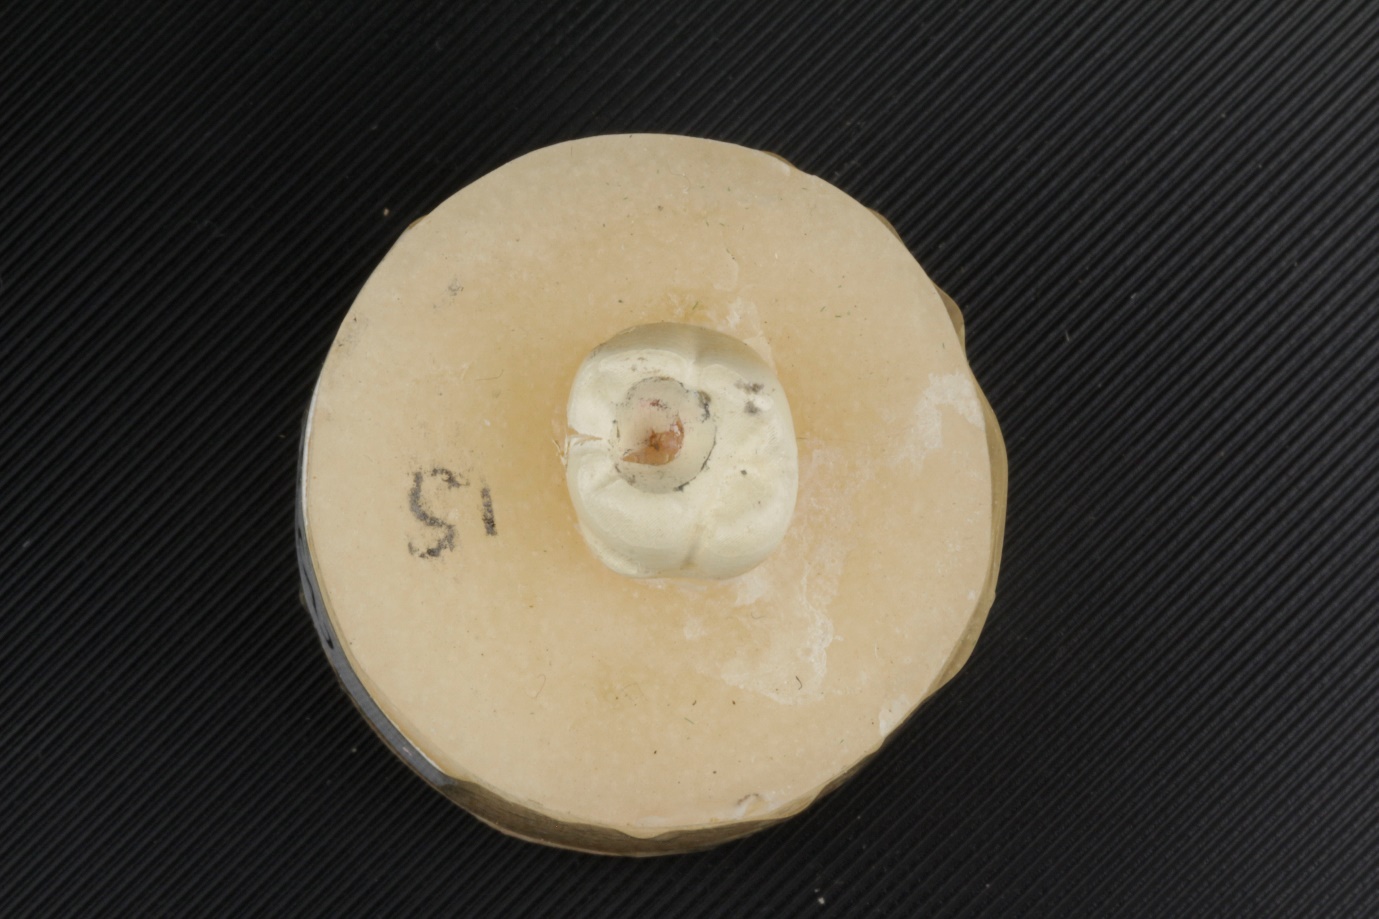


**Supplementary Figure 2:** The failure pattern of PEEK.


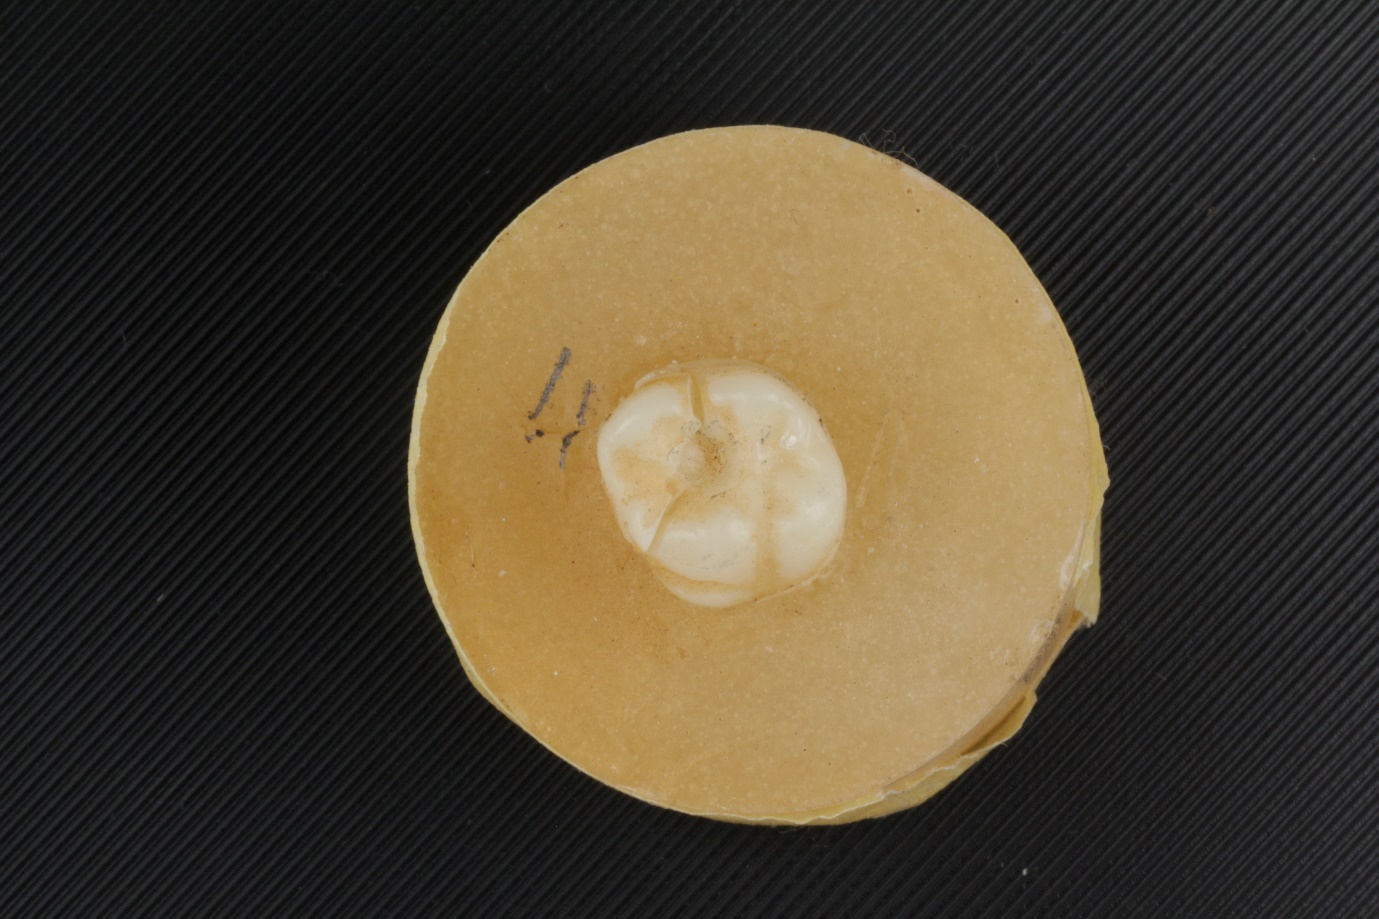

Supplement: Supplementary file 1 [file 570687_Supplementary%20Figures.docx]
